# Supplementary material for: MYC Targeted Long Noncoding RNA DANCR Promotes Cancer in Part by Reducing p21 Levels
Source: Oxford University Press journal article supplement (doi:10.1158/0008-5472.can-17-0815), 2017-11-27
Supplement: 00085472can170815-sup-180738_2_supp_4351316_bydmdy.docx [file 00085472can170815-sup-180738_2_supp_4351316_bydmdy.docx]

**Supplemental Information**

**Table S1. MYC-regulated genes in P493-6 cell line**

Table S1 provides expression profiles of genes in response to MYC induction in the lymphoma model cell line P493-6.

**Table S2. MYC-regulated lncRNAs in P493-6 cell line**

Table S2 provides the expression profiles of long non-coding RNAs (lncRNAs) in response to MYC induction.

**Table S3. MYC-regulated lncRNAs in CCLE**

Table S3 displays expression levels of lncRNAs, which were regulated by MYC in the P493-6 cell line, across the collection of cell lines in the Cancer Cell Line Encyclopedia (CCLE).

**Table S4. GO analysis of genes that affected by DANCR knockdown in PC3 cells**

Table S4 provides gene ontology (GO) analysis of genes whose expression were altered by lncRNA DANCR knockdown.

**Table S5. Top 500 up-regulated and down-regulated genes by knockdown of DANCR in PC3 cells.**

Table S5 lists expression profiles of genes altered by knockdown of DANCR.

**Supplemental Figure Legends**

**Figure S1. The expression of DANCR is upregulated by MYC activation in P493-6 cells**

Normalized expression of *DANCR* (KIAA0114) in MYC-OFF or MYC-ON P493-6 cells measured by exon microarrays (*PLoS One* 6, e26057). Three independent array experiments were performed.

**Figure S2. Human-mouse sequence alignment analysis of *DANCR* and *mDancr***

**Figure S3. The mRNA expression of the DANCR adjacent protein-coding genes in cells transduced with DANCR-specific siRNA**

Control and DANCR siRNAs were transduced into PC3 cells. After 48 and 72 hours, the mRNA expression levels of the DANCR adjacent protein-coding genes (ERVMER34-1 and UPS46) were analyzed by qRT-PCR.

**Figure S4. Effects of two DANCR targeting antisense morpholinos on P493-6 cell proliferation and p21 expression.**

A. RT-PCR analysis of *DANCR* expression in P493-6 after being treated by various concentrations of the two *DANCR* antisense morpholinos. B. Effects of two different morpholinos targeting *DANCR* on proliferation of P493-6 cells as compared with control morpholino. C. Induction of P21 by loss of *DANCR* expression in P493-6 cells treated by two concentrations of the two DANCR antisense morpholinos.
